# Supplementary material for: RNA-Seq Transcriptome Analysis of Differentiated Human Oligodendrocytic MO3.13 Cells Shows Upregulation of Genes Involved in Myogenesis
Source: MDPI journal article supplement (doi:10.3390/ijms23115969), 2022-05-25
Supplement: s1 [file s1]

## RNA-seq transcriptome analysis of differentiated human oligodendrocytic MO3.13 cells shows up-regulation of genes involved in myogenesis

Aleksandra Głowacka<sup>1</sup>, Ewa Kilanczyk<sup>2</sup>, Małgorzata Maksymowicz<sup>1</sup>, Małgorzata Zawadzka<sup>1</sup>  
Wiesława Leśniak<sup>1</sup>, Anna Filipek<sup>1</sup>✉

<sup>1</sup>Nencki Institute of Experimental Biology, Polish Academy of Sciences, 3 Pasteur Street, 02-093 Warsaw, Poland

<sup>2</sup>Department of Medical Biology, Pomeranian Medical University, 1 Rybacka Street, 70-204 Szczecin, Poland

✉ **Corresponding author:**

Anna Filipek

Nencki Institute of Experimental Biology, Polish Academy of Sciences,  
3 Pasteur Street, 02-093 Warsaw, Poland,

e-mail: [a.filipek@nencki.edu.pl](mailto:a.filipek@nencki.edu.pl)

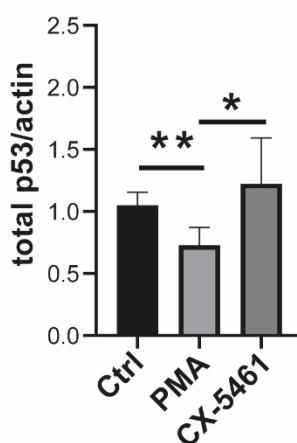

**Figure S1. The level of total p53 in control (Ctrl), PMA or CX-5461 MO3.13 treated cells.** Results are presented as a ratio of total p53 normalized to actin (loading control). Densitometric analysis of results (n=6) was performed with the use of one sample *t* test. Results are presented as means  $\pm$  standard error. The level of statistical significance is indicated using  $*p \leq 0.05$ ,  $**p \leq 0.01$ .

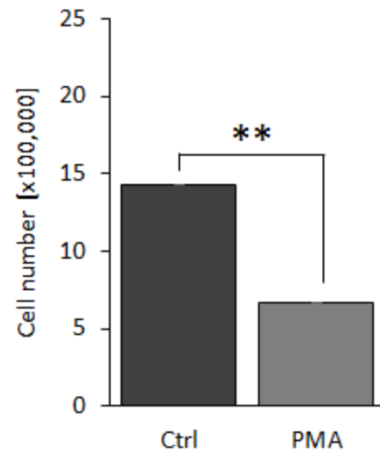

**Figure S2. Analysis of cell proliferation.** MO3.13 cells were cultured for 72 h in the absence (control; Ctrl) or presence of PMA (n=4), \*\* $p \leq 0.01$ .

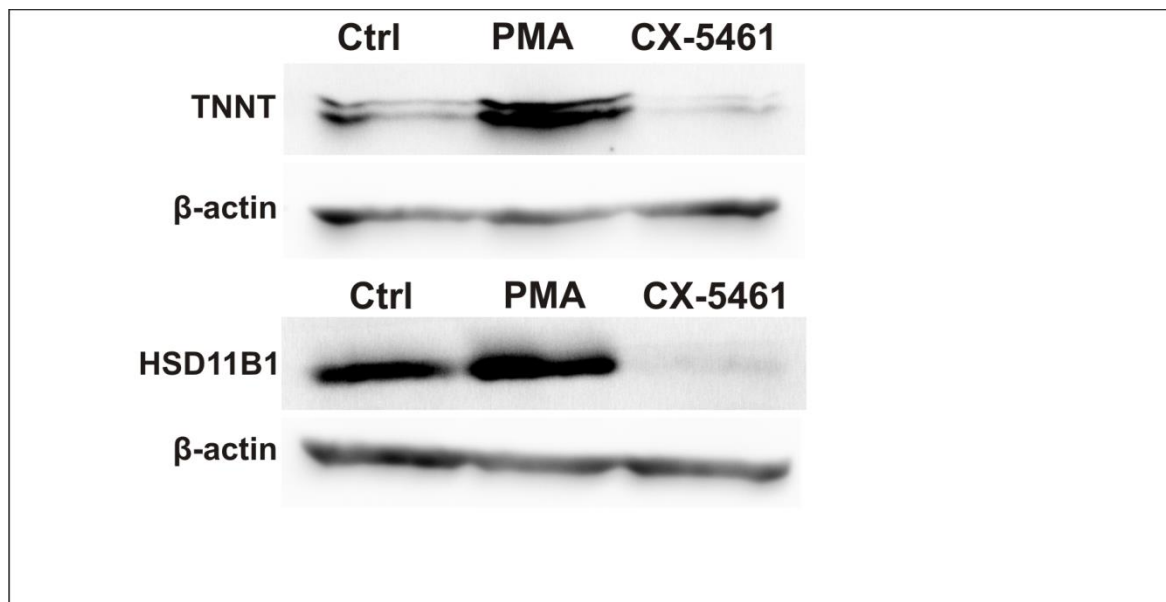

**Figure S3. The protein level of TNNT and HSD11B1 in MO3.13 cells, control (Ctrl) and treated with PMA or CX-5461.** Actin served as loading control.

**Table S1. Sequences of primers used in RT-qPCR.**

| <b>Gene</b>    | <b>Forward Primer (5'-&gt;3')</b> | <b>Reverse Primer (5'-&gt;3')</b> |
|----------------|-----------------------------------|-----------------------------------|
| <i>18S</i>     | CGCCGCTAGAGGTGAAATTC              | TTGGCAAATGCTTTCGCTC               |
| <i>CASQ2</i>   | AGCTTGTGGAGTTTGTGAAG              | GGATTGTCAGTGTTGTCCC               |
| <i>HSD11B1</i> | GACAGCGAGGTCAAAAGAAA              | GTCCTCCCATGAGCTTTCCTG             |
| <i>MYH *</i>   | GAGGACATGGCCATGATGAC              | GGCATTGTCAGAGATGGAGAAG            |
| <i>TNNT3</i>   | AGGAGGAGGATGCCAAGAGGA             | TCCTTGGCCTTGTCCTCAGTTT            |
| <i>GPR17</i>   | GAGAGATGCTGAAACTCTCAGC            | CAGGGAGAAGTTGGTGATCAGAC           |
| <i>MBP</i>     | ACCCAAGATGAAAACCCCGTA             | TCCGTAGCCAAATCCTGGTCT             |
| <i>MOG</i>     | TTTTGATCCCCACTTTCTGAGG            | CGTAGCTCTTCAAGGAATTGCC            |

**Table S2. MO3.13 genes with statistically significant change in expression after PMA treatment.** 6769 genes were up-regulated and 5856 - down-regulated.

(Table S2, please see the excel file)
